# Supplementary material
Source: PubMed Central journal article supplement (PMC4787993)
Supplement: ronp804823.w1_default.pdf [file ronp804823.w1_default.pdf]

## Appendix

**Figure 1.** Cumulative meta-analysis—Cardiovascular disease mortality

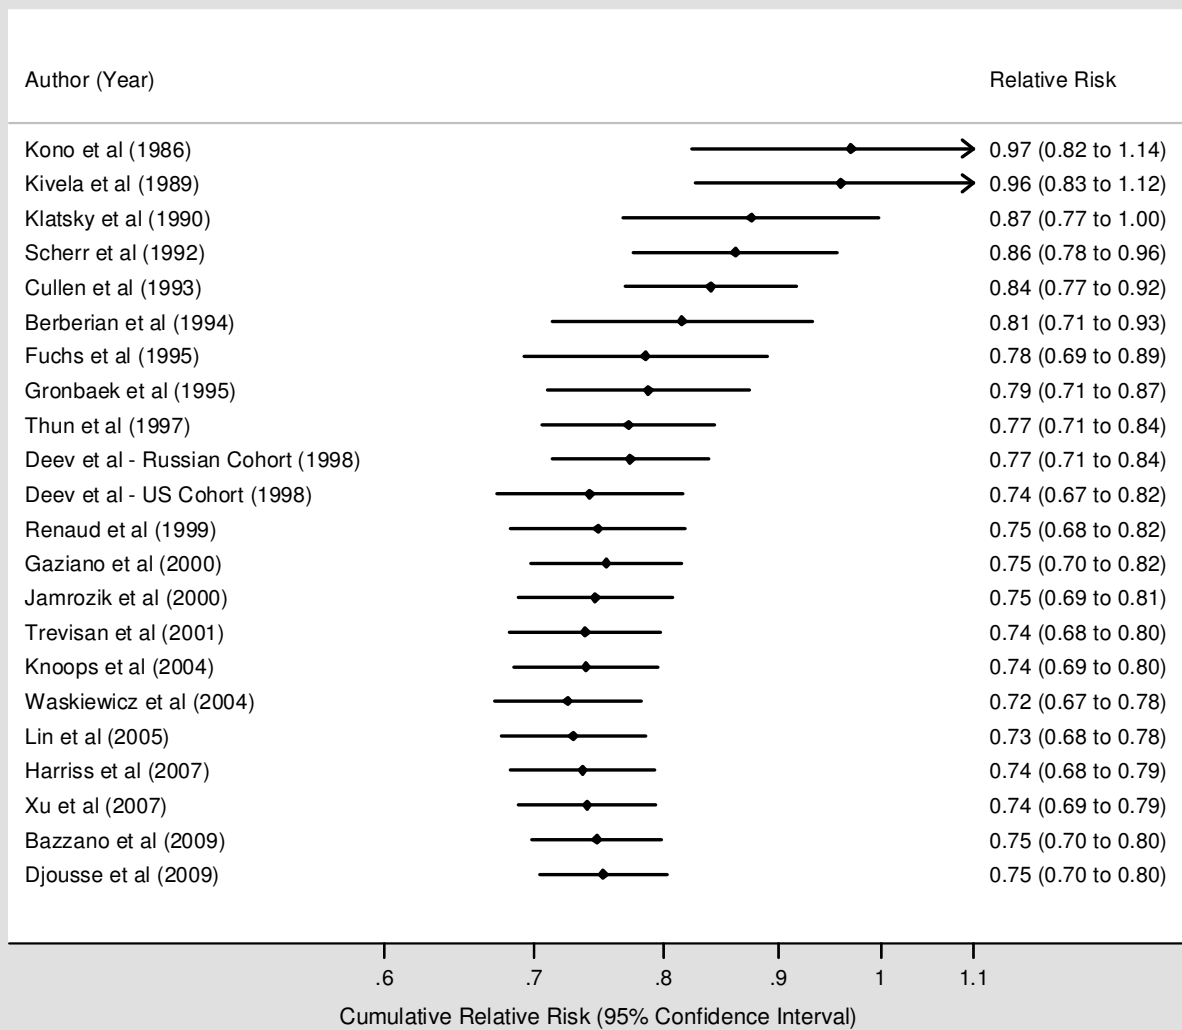

**Figure 2.** Cumulative meta-analysis—Incident coronary heart disease

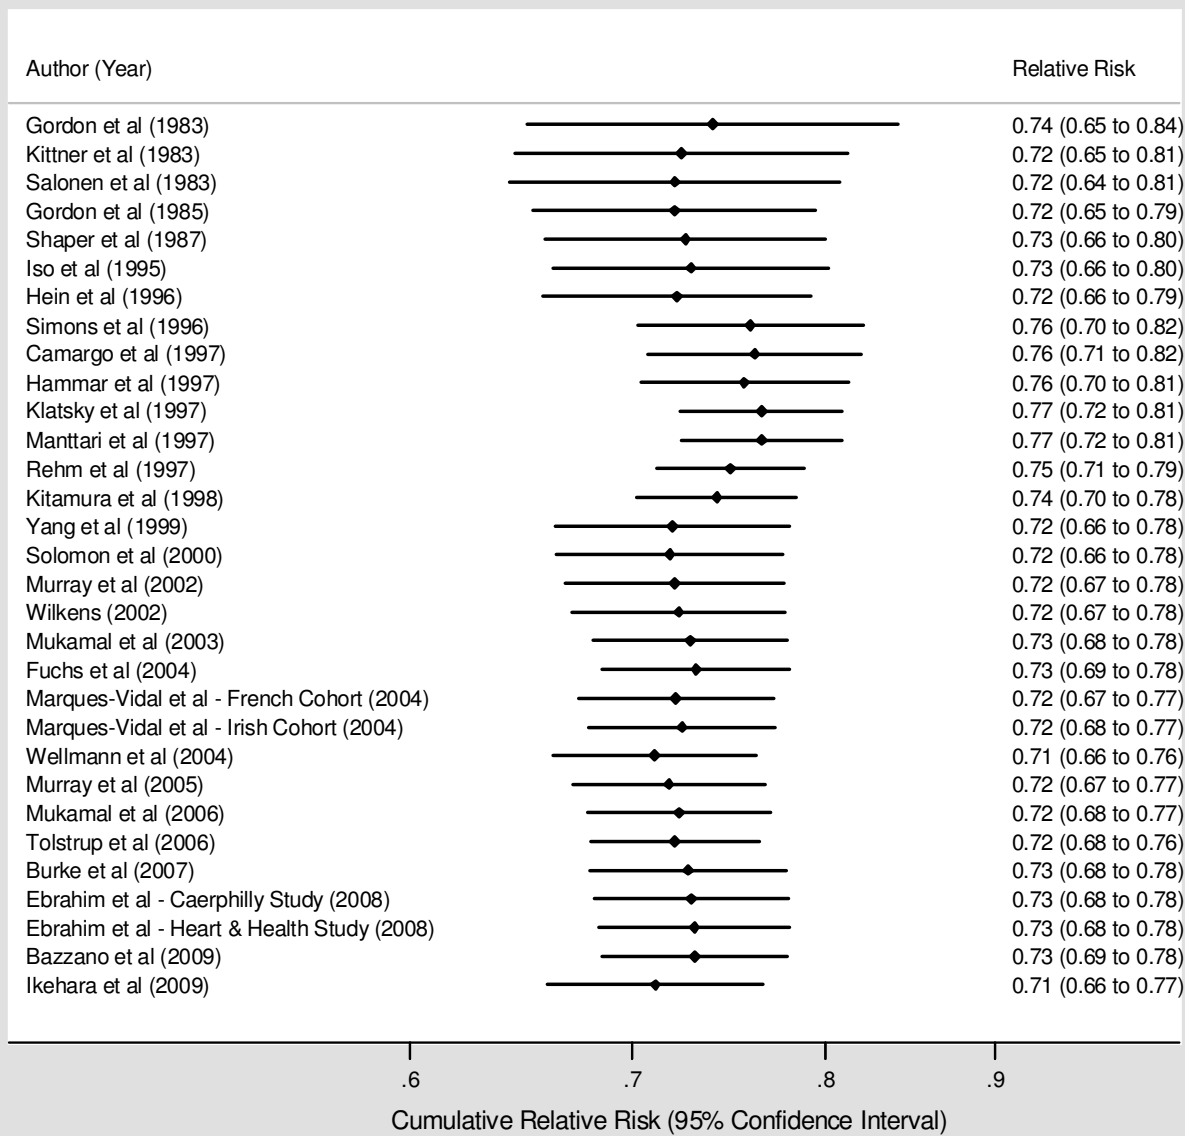

**Figure 3.** Cumulative meta-analysis—Coronary heart disease mortality

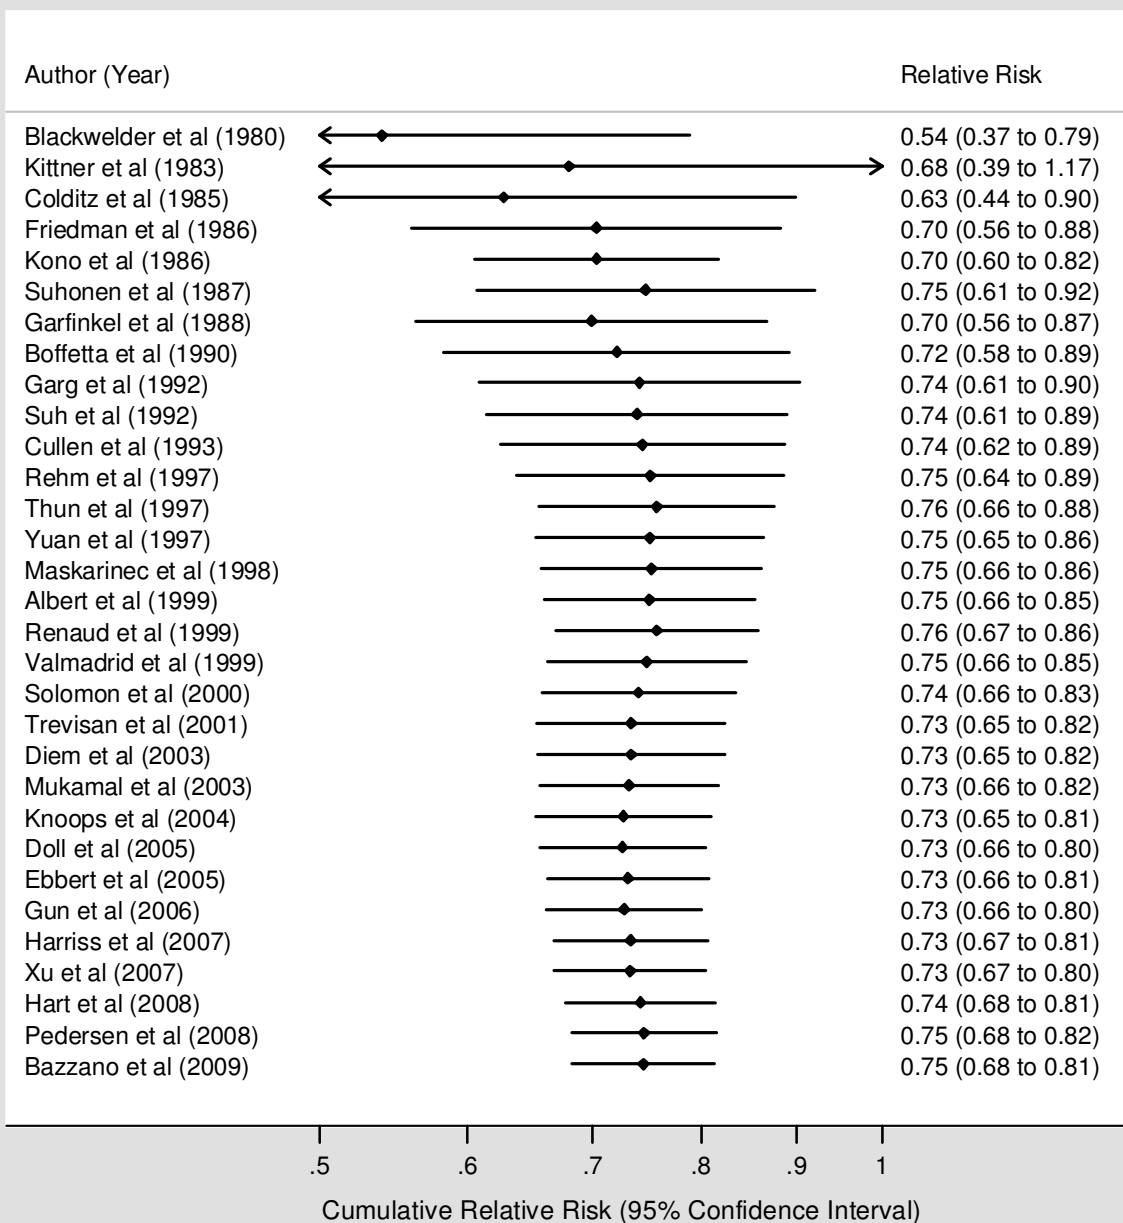

**Table 1.** Confounding factors and methods for adjustment (cardiovascular disease mortality)

| Source                 | Method for adjustment           | Measure of effect | Confounding factors                                                                                                                                                                                                                                                                                                                                                                                                                                       |
|------------------------|---------------------------------|-------------------|-----------------------------------------------------------------------------------------------------------------------------------------------------------------------------------------------------------------------------------------------------------------------------------------------------------------------------------------------------------------------------------------------------------------------------------------------------------|
| Bazzano et al (2009)   | Proportional Hazards Regression | Relative Risk     | Age, body mass index, average systolic blood pressure, physical activity, cigarette smoking, diabetes education, urban or rural residence, and living in North China                                                                                                                                                                                                                                                                                      |
| Berberian et al (1994) | Proportional Hazards Regression | Relative Risk     | Age, body mass index, serum cholesterol, systolic blood pressure, diastolic blood pressure, pulse rate, cigarette smoking, history of antihypertension drug use                                                                                                                                                                                                                                                                                           |
| Cullen et al (1993)    | Proportional Hazards Regression | Relative Risk     | Age, sex, occupation, smoking, blood pressure, probable or suspected coronary heart disease, forced expiratory volume, diabetes, cholesterol, uric acid, treatment for hypertension                                                                                                                                                                                                                                                                       |
| Deev et al (1998)      | Proportional Hazards Regression | Hazard Ratio      | Education, heart rate, total cholesterol, body mass index                                                                                                                                                                                                                                                                                                                                                                                                 |
| Djousse et al (2009)   | Proportional Hazards Regression | Hazard Ratio      | Age, body mass index, smoking, physical activity, fruit and vegetable intake, menopausal status, family history of premature myocardial infarction, treatment for hypertension, systolic blood pressure, history of diabetes mellitus, hemoglobin A1c, high-sensitivity C-reactive protein, fibrinogen, soluble intercellular adhesion molecules, high-density and low-density lipoprotein cholesterol, triglycerides, treatment for hypercholesterolemia |
| Fuchs et al (1995)     | Proportional Hazards Regression | Relative Risk     | Age, smoking status, body mass index, regular aspirin use, regular vigorous exercise, high plasma cholesterol level, diabetes, hypertension, myocardial infarction in a parent at $\leq 60$ years of age, past or present oral-contraceptive use, menopausal status, past or present postmenopausal hormone use, energy-adjusted intake of dietary fiber and saturated fat                                                                                |
| Gaziano et al (2000)   | Proportional Hazards Regression | Relative Risk     | Age, smoking, diabetes, exercise, body mass index                                                                                                                                                                                                                                                                                                                                                                                                         |
| Gronbaek et al (1995)  | Multiple Poisson Regression     | Relative Risk     | Age, sex, intakes of beer, wine and spirits, first order interactions between these variables                                                                                                                                                                                                                                                                                                                                                             |
| Harriss et al (2007)   | Proportional Hazards Regression | Hazard Ratio      | Age, country of birth, smoking, total daily energy, fruit intake, saturated fat intake                                                                                                                                                                                                                                                                                                                                                                    |
| Jamrozik et al (2000)  | Proportional Hazards Regression | Hazard Ratio      | Sex, age                                                                                                                                                                                                                                                                                                                                                                                                                                                  |

---

|                         |                                 |               |                                                                                                                                                                                                                  |
|-------------------------|---------------------------------|---------------|------------------------------------------------------------------------------------------------------------------------------------------------------------------------------------------------------------------|
| Kivela et al (1989)     | Multiple Logistic Regression    | Odds Ratio    | Age, area, serum cholesterol, systolic blood pressure, body mass index, smoking status, forced expiratory volume, blood hemoglobin                                                                               |
| Klatsky et al (1990)    | Proportional Hazards Regression | Relative Risk | Age, sex, race, smoking, body mass index, marital status, education                                                                                                                                              |
| Knoops et al (2004)     | Proportional Hazards Regression | Hazard Ratio  | Diet, physical activity, smoking, age, sex, number of years of education, body mass index, study                                                                                                                 |
| Kono et al (1986)       | Multiple Logistic Regression    | Relative Risk | Age, smoking                                                                                                                                                                                                     |
| Lin et al (2005)        | Proportional Hazards Regression | Relative Risk | Age, body mass index, education, cigarette smoking, exercise, history of diabetes, history of hypertension                                                                                                       |
| Renaud et al (1999)     | Proportional Hazards Regression | Relative Risk | Age, smoking, education, body mass index                                                                                                                                                                         |
| Scherr et al (1992)     | Multiple Logistic Regression    | Relative Risk | Sex, age, current smoking, one or more limitations in activities of daily living, mental status score, history of hypertension, history of diabetes                                                              |
| Thun et al (1997)       | Proportional Hazards Regression | Relative Risk | Education, body mass index, smoking, a crude index of fat consumption, use or nonuse of estrogen-replacement therapy in women                                                                                    |
| Trevisan et al (2001)   | Proportional Hazards Regression | Relative Risk | Age, current smoking                                                                                                                                                                                             |
| Waskiewicz et al (2004) | Proportional Hazards Regression | Relative Risk | Age, screening, cigarette smoking, body mass index, level of education, total cholesterol level, ischemic heart disease symptoms at baseline examination, systolic blood pressure, health status self-assessment |
| Xu et al (2007)         | Proportional Hazards Regression | Hazard Ratio  | Age, education, body mass index, history of any cancer, chronic bronchitis, diabetes, hypertension, coronary heart disease, stroke                                                                               |

---

**Table 2.** Confounding factors and methods for adjustment (incident coronary heart disease events)

| Source                | Method for adjustment           | Measure of effect | Confounding factors                                                                                                                                                                                                                                                   |
|-----------------------|---------------------------------|-------------------|-----------------------------------------------------------------------------------------------------------------------------------------------------------------------------------------------------------------------------------------------------------------------|
| Bazzano et al (2009)  | Proportional Hazards Regression | Relative Risk     | Age, body mass index, average systolic blood pressure, physical activity, cigarette smoking, diabetes education, urban or rural residence, and living in North China                                                                                                  |
| Burke et al (2007)    | Proportional Hazards Regression | Hazard Ratio      | Age, sex, accessibility to alcohol, smoking, exercise                                                                                                                                                                                                                 |
| Camargo et al (1997)  | Proportional Hazards Regression | Relative Risk     | Age, Aspirin use, Beta carotene use, smoking, exercise at least once per week, diabetes mellitus, parental history of myocardial infarction                                                                                                                           |
| Ebrahim et al (2008)  | Proportional Hazards Regression | Relative Risk     | None                                                                                                                                                                                                                                                                  |
| Fuchs et al (2004)    | Proportional Hazards Regression | Hazard Ratio      | Age, cigarette-years of smoking, body mass index, low density lipoprotein and high density lipoprotein cholesterol level, waist-to-hip ratio, educational level, income, sport index, diabetes mellitus, systolic blood pressure, use of anti-hypertensive medication |
| Gordon et al (1983)   | Multiple Logistic Regression    | Relative Risk     | Age, systolic blood pressure, cigarettes/day, relative weight, Sf 0-20 and Sf 20-400 lipoproteins                                                                                                                                                                     |
| Gordon et al (1985)   | Multiple Logistic Regression    | Relative Risk     | None                                                                                                                                                                                                                                                                  |
| Hammar et al (1997)   | Multiple Logistic Regression    | Relative Risk     | Age, country of residence, calendar year, smoking                                                                                                                                                                                                                     |
| Hein et al (1996)     | Multiple Logistic Regression    | Relative Risk     | Age, hypertension, tobacco, high density lipoprotein cholesterol, systolic blood pressure                                                                                                                                                                             |
| Ikehara et al (2009)  | Proportional Hazards Regression | Hazard Ratio      | Age, smoking, body mass index, history of hypertension, history of diabetes, sports at leisure time, levels of mental stress, presence of flushing, presence of job, marital status, medical checkups, area                                                           |
| Iso et al (1995)      | Proportional Hazards Regression | Relative Risk     | Age, hypertension category, serum total cholesterol level, cigarette smoking, diabetes mellitus                                                                                                                                                                       |
| Kitamura et al (1998) | Proportional Hazards Regression | Relative Risk     | Age, serum total cholesterol, cigarette smoking, body mass index, left ventricular hypertrophy, history of diabetes mellitus                                                                                                                                          |
| Kittner et al (1983)  | Multiple Logistic Regression    | Odds Ratio        | Age, number of cigarettes currently smoked, physical activity index, location of residence                                                                                                                                                                            |

|                            |                                 |               |                                                                                                                                                                                                                                                                                         |
|----------------------------|---------------------------------|---------------|-----------------------------------------------------------------------------------------------------------------------------------------------------------------------------------------------------------------------------------------------------------------------------------------|
| Klatsky et al (1997)       | Proportional Hazards Regression | Relative Risk | Age, race, body mass index, cigarette smoking, marital status, education, coffee use, baseline coronary heart disease risk                                                                                                                                                              |
| Manttari et al (1997)      | Proportional Hazards Regression | Relative Risk | Age, smoking                                                                                                                                                                                                                                                                            |
| Marques-Vidal et al (2004) | Multiple Logistic Regression    | Relative Risk | Age, marital status, educational level, vigorous exercise, body mass index, systolic blood pressure, diastolic blood pressure, total cholesterol, triglycerides, smoking status, anti-hypertensive drug treatment, hypolipidaemic drug treatment, center                                |
| Mukamal et al (2003)       | Multiple Logistic Regression    | Relative Risk | Age, smoking status, body mass index, diabetes mellitus, hypertension, hypercholesterolemia, parental history of myocardial infarction, aspirin use, physical activity, intake of energy, energy adjusted intake of folate, vitamin E, saturated fat, trans fat, dietary fiber          |
| Mukamal et al (2006)       | Proportional Hazards Regression | Relative Risk | Age, sex, race, education, marital status, smoking, exercise intensity, depression scale, frequent aspirin use, body mass index, diabetes mellitus                                                                                                                                      |
| Murray et al (2002)        | Proportional Hazards Regression | Hazard Ratio  | Age, education level, married status, cigarette smoking                                                                                                                                                                                                                                 |
| Murray et al (2005)        | Proportional Hazards Regression | Hazard Ratio  | Age group, randomized group assignment, forced vital capacity percent predicted, body mass index, level of education, married status, cigarettes per day                                                                                                                                |
| Rehm et al (1997)          | Proportional Hazards Regression | Relative Risk | Age                                                                                                                                                                                                                                                                                     |
| Salonen et al (1983)       | Multiple Logistic Regression    | Relative Risk | Age, smoking, serum cholesterol, serum triglycerides, diastolic blood pressure, interaction between spirit and beer intake                                                                                                                                                              |
| Shaper et al (1987)        | Multiple Logistic Regression    | Relative Risk | Age, smoking, social class                                                                                                                                                                                                                                                              |
| Simons et al (1996)        | Proportional Hazards Regression | Hazard Ratio  | Age, prior history of coronary heart disease, use of anti-hypertensive medication, diabetes, serum, low density and high density lipoprotein cholesterol, serum triglycerides, poor self-rating of health                                                                               |
| Solomon et al (2000)       | Multiple Logistic Regression    | Relative Risk | Age, time period, body mass index, cigarette smoking, parental history of myocardial infarction before age 60 years, hypertension, hypercholesterolemia, menopausal status/postmenopausal hormone use, aspirin use, multivitamin use, vitamin E supplement use, physical activity level |
| Tolstrup et al (2006)      | Proportional Hazards Regression | Hazard Ratio  | Age, smoking, physical activity, body mass index, total intake of fruit, vegetables, fish, and saturated fat                                                                                                                                                                            |

---

|                          |                                 |                 |                                                                                                                                                                                                                |
|--------------------------|---------------------------------|-----------------|----------------------------------------------------------------------------------------------------------------------------------------------------------------------------------------------------------------|
| Wellmann et al<br>(2004) | Proportional Hazards Regression | Hazard<br>Ratio | Age, smoking, physical activity, partner status, education, body mass index, total cholesterol, hypertension                                                                                                   |
| Wilkens<br>(2002)        | Multiple Logistic Regression    | Odds Ratio      | Age, household income, education, diagnosis of diabetes mellitus, hypertension, family history of heart disease, physical activity, body mass index, smoking history, hormone replacement therapy (women only) |
| Yang et al<br>(1999)     | Multiple Logistic Regression    | Odds Ratio      | Age, sex, coronary calcium, diabetes mellitus, systemic hypertension, cigarette smoking, left ventricular hypertrophy, low and high density lipoprotein cholesterol                                            |

---



**Table 3.** Confounding factors and methods for adjustment (coronary heart disease mortality)

| Source                   | Method for adjustment           | Measure of effect | Confounding factors                                                                                                                                                                                                                                                                                                |
|--------------------------|---------------------------------|-------------------|--------------------------------------------------------------------------------------------------------------------------------------------------------------------------------------------------------------------------------------------------------------------------------------------------------------------|
| Albert et al (1999)      | Proportional Hazards Regression | Relative Risk     | Age, aspirin and beta-carotene treatment assignment, body mass index, smoking, history of diabetes, history of hypertension, history of hypercholesterolemia, vigorous exercise, vitamin E, vitamin C, multivitamin use at baseline and fish consumption at 12 months                                              |
| Bazzano et al (2009)     | Proportional Hazards Regression | Relative Risk     | Age, body mass index, average systolic blood pressure, physical activity, cigarette smoking, diabetes education, urban or rural residence, and living in North China                                                                                                                                               |
| Blackwelder et al (1980) | Multiple Logistic Regression    | Relative Risk     | Age                                                                                                                                                                                                                                                                                                                |
| Boffetta et al (1990)    | Multiple Logistic Regression    | Relative Risk     | Age, smoking, education                                                                                                                                                                                                                                                                                            |
| Colditz et al (1985)     | Proportional Hazards Regression | Relative Risk     | Age                                                                                                                                                                                                                                                                                                                |
| Cullen et al (1993)      | Proportional Hazards Regression | Relative Risk     | Age, sex, occupation, smoking, blood pressure, probable or suspected coronary heart disease, forced expiratory volume, diabetes, cholesterol, uric acid, treatment for hypertension                                                                                                                                |
| Diem et al (2003)        | Proportional Hazards Regression | Relative Risk     | None                                                                                                                                                                                                                                                                                                               |
| Doll et al (2005)        | Proportional Hazards Regression | Relative Risk     | Age, smoking                                                                                                                                                                                                                                                                                                       |
| Ebbert et al (2005)      | Proportional Hazards Regression | Hazard Ratio      | Age, hypertension, diabetes, education, marital status, physical activity, body mass index, waist-to-hip ratio, hormone replacement therapy, vitamin supplement use, fruit/vegetable consumption, red meat consumption, total caloric intake, whole-grain intake, cholesterol intake, vitamin E intake, pack-years |
| Friedman et al (1986)    | Proportional Hazards Regression | Relative Risk     | Age                                                                                                                                                                                                                                                                                                                |
| Garfinkel et al (1988)   | Multiple Logistic Regression    | Relative Risk     | Age                                                                                                                                                                                                                                                                                                                |
| Garg et al (1992)        | Proportional Hazards Regression | Relative Risk     | Age, race, education, body mass index, history of diabetes, cholesterol, systolic blood pressure, postmenopausal status                                                                                                                                                                                            |

---

|                         |                                 |               |                                                                                                                                                                                                                                                                                         |
|-------------------------|---------------------------------|---------------|-----------------------------------------------------------------------------------------------------------------------------------------------------------------------------------------------------------------------------------------------------------------------------------------|
| Gun et al (2006)        | Proportional Hazards Regression | Relative Risk | Age, calendar year, smoking                                                                                                                                                                                                                                                             |
| Harriss et al (2007)    | Proportional Hazards Regression | Hazard Ratio  | Age, country of birth, smoking, total daily energy, fruit intake, saturated fat intake                                                                                                                                                                                                  |
| Hart et al (2008)       | Proportional Hazards Regression | Relative Risk | Age, smoking, cholesterol, body mass index, adjusted forced expiratory volume, social class, father's social class, education, car use, siblings, deprivation category, angina, ischemia on electrocardiogram, bronchitis                                                               |
| Kittner et al (1983)    | Multiple Logistic Regression    | Odds Ratio    | Age, number of cigarettes currently smoked, physical activity index, location of residence                                                                                                                                                                                              |
| Knoops et al (2004)     | Proportional Hazards Regression | Hazard Ratio  | Diet, physical activity, smoking, age, sex, number of years of education, body mass index, study                                                                                                                                                                                        |
| Kono et al (1986)       | Multiple Logistic Regression    | Relative Risk | Age, smoking                                                                                                                                                                                                                                                                            |
| Maskarinec et al (1998) | Proportional Hazards Regression | Relative Risk | Ethnicity, age, years of education, body mass index, smoking status                                                                                                                                                                                                                     |
| Mukamal et al (2003)    | Multiple Logistic Regression    | Relative Risk | Age, smoking status, body mass index, diabetes, hypertension, hypercholesterolemia, parental history of myocardial infarction, aspirin use, physical activity, intake of energy, energy-adjusted intake of folate, vitamin E, saturated fat, trans fat, dietary fiber                   |
| Pedersen et al (2008)   | Proportional Hazards Regression | Hazard Ratio  | Age, smoking habits, body mass index, education, marital status, known diabetes, physical activity, high density lipoprotein cholesterol                                                                                                                                                |
| Rehm et al (1997)       | Proportional Hazards Regression | Relative Risk | Age, smoking status                                                                                                                                                                                                                                                                     |
| Renaud et al (1999)     | Proportional Hazards Regression | Relative Risk | Age, smoking, education, body mass index                                                                                                                                                                                                                                                |
| Solomon et al (2000)    | Multiple Logistic Regression    | Relative Risk | Age, time period, body mass index, cigarette smoking, parental history of myocardial infarction before age 60 years, hypertension, hypercholesterolemia, menopausal status/postmenopausal hormone use, aspirin use, multivitamin use, vitamin E supplement use, physical activity level |
| Suh et al (1992)        | Proportional Hazards Regression | Relative Risk | Age at randomization, serum cholesterol, number of cigarettes per day, serum cholesterol                                                                                                                                                                                                |
| Suhonen et al (1987)    | Proportional Hazards Regression | Relative Risk | Age                                                                                                                                                                                                                                                                                     |

---

---

|                           |                                 |               |                                                                                                                                                             |
|---------------------------|---------------------------------|---------------|-------------------------------------------------------------------------------------------------------------------------------------------------------------|
| Thun et al<br>(1997)      | Proportional Hazards Regression | Relative Risk | Education, body mass index, smoking, a crude index of fat consumption, use or nonuse of estrogen-replacement therapy in women                               |
| Trevisan et al<br>(2001)  | Proportional Hazards Regression | Relative Risk | Age, current smoking                                                                                                                                        |
| Valmadrid et al<br>(1999) | Proportional Hazards Regression | Relative Risk | Age, sex, cigarette smoking, insulin use, glycosylated hemoglobin level, plasma C-peptide level, digoxin use, presence and severity of diabetic retinopathy |
| Xu et al<br>(2007)        | Proportional Hazards Regression | Hazard Ratio  | Age, education, body mass index, history of any cancer, chronic bronchitis, diabetes, hypertension, coronary heart disease, stroke                          |
| Yuan et al<br>(1997)      | Proportional Hazards Regression | Relative Risk | Age, level of education, cigarette smoking                                                                                                                  |

---

**Table 4.** Confounding factors and methods for adjustment (incident stroke events)

| Source                  | Method for adjustment           | Measure of effect | Confounding factors                                                                                                                                                                                                                |
|-------------------------|---------------------------------|-------------------|------------------------------------------------------------------------------------------------------------------------------------------------------------------------------------------------------------------------------------|
| Bazzano et al (2007)    | Proportional Hazards Regression | Relative Risk     | Age, body mass index, physical activity, urban or rural residence, northern or southern China, cigarette smoking, diabetes, education, average systolic blood pressure                                                             |
| Berger et al (1999)     | Proportional Hazards Regression | Relative Risk     | Age, treatment assignment (aspirin or beta-carotene), systolic blood pressure, current treatment for hypertension, smoking, history of diabetes, body mass index, exercise                                                         |
| Chiuve et al (2008)     | Proportional Hazards Regression | Relative Risk     | Age, calendar year, parental history of myocardial infarction at <60 years of age, regular aspirin use, vitamin E supplementation, hormone therapy (women only)                                                                    |
| Djousse et al (2002)    | Proportional Hazards Regression | Hazard Ratio      | Age, sex, body mass index, smoking, diabetes mellitus                                                                                                                                                                              |
| Donahue et al (1986)    | Proportional Hazards Regression | Relative Risk     | Age, hypertensive status, serum cholesterol concentration, body mass index, cigarette smoking, uric acid concentration, glucose concentration, hematocrit                                                                          |
| Elkind et al (2006)     | Proportional Hazards Regression | Hazard Ratio      | Age, sex, race-ethnicity, education, history of hypertension, diabetes mellitus, current cigarette smoking, atrial fibrillation, levels of high density lipoprotein cholesterol                                                    |
| Ikehara et al (2009)    | Proportional Hazards Regression | Hazard Ratio      | Age, smoking, body mass index, history of hypertension, history of diabetes, sports at leisure time, levels of mental stress, presence of flushing, presence of job, marital status, medical checkups, area                        |
| Iso et al (1995)        | Proportional Hazards Regression | Relative Risk     | Age, hypertension category, serum total cholesterol level, cigarette smoking, diabetes mellitus                                                                                                                                    |
| Jousilahti et al (2000) | Proportional Hazards Regression | Relative Risk     | None                                                                                                                                                                                                                               |
| Kiyohara et al (1995)   | Proportional Hazards Regression | Relative Risk     | Age, sex                                                                                                                                                                                                                           |
| Klatsky et al (2002)    | Proportional Hazards Regression | Relative Risk     | Age, sex, race, body mass index, education, smoking                                                                                                                                                                                |
| Leppala et al (1999)    | Proportional Hazards Regression | Relative Risk     | Age, body mass index, serum total cholesterol, number of cigarettes smoked daily, history of diabetes, history of heart disease, education, leisure-time physical activity, supplementation with alpha-tocopherol or beta-carotene |

---

|                          |                                 |               |                                                                                                                                                                                      |
|--------------------------|---------------------------------|---------------|--------------------------------------------------------------------------------------------------------------------------------------------------------------------------------------|
| Mukamal et al<br>(2005)  | Proportional Hazards Regression | Relative Risk | Age, sex, race, education, marital status, smoking, exercise intensity, depression score, frequent aspirin use, body mass index, diabetes at baseline                                |
| Sankai et al<br>(2000)   | Proportional Hazards Regression | Relative Risk | Age, sex, smoking category, blood pressure category, serum total cholesterol, body mass index, history of diabetes mellitus                                                          |
| Truelsen et al<br>(1998) | Multiple Poisson Regression     | Relative Risk | Age, sex, smoking, body mass index, physical activity in leisure time, systolic blood pressure, cholesterol, antihypertensive treatment, triglycerides, education, diabetes mellitus |
| Woo et al<br>(1990)      | Multiple Logistic Regression    | Relative Risk | None                                                                                                                                                                                 |
| Zhang et al<br>(2004)    | Proportional Hazards Regression | Relative Risk | Age, sex, body mass index, serum total cholesterol, systolic blood pressure                                                                                                          |

---

**Table 5.** Confounding factors and methods for adjustment (stroke mortality)

| <b>Source</b>            | <b>Method for adjustment</b>    | <b>Measure of effect</b> | <b>Confounding factors</b>                                                                                                                                                                                                |
|--------------------------|---------------------------------|--------------------------|---------------------------------------------------------------------------------------------------------------------------------------------------------------------------------------------------------------------------|
| Bazzano et al (2007)     | Proportional Hazards Regression | Relative Risk            | Age, body mass index, physical activity, urban or rural residence, northern or southern China, cigarette smoking, diabetes, education, average systolic blood pressure                                                    |
| Blackwelder et al (1980) | Multiple Logistic Regression    | Relative Risk            | Age                                                                                                                                                                                                                       |
| Gaziano et al (2000)     | Proportional Hazards Regression | Relative Risk            | Age, smoking, diabetes, exercise, body mass index                                                                                                                                                                         |
| Hansagi et al (1995)     | Multiple Logistic Regression    | Relative Risk            | Age, smoking                                                                                                                                                                                                              |
| Hart et al (2008)        | Proportional Hazards Regression | Relative Risk            | Age, smoking, cholesterol, body mass index, adjusted forced expiratory volume, social class, father's social class, education, car use, siblings, deprivation category, angina, ischemia on electrocardiogram, bronchitis |
| Jakovljevic et al (2004) | Proportional Hazards Regression | Relative Risk            | Sex, smoking, body mass index, blood pressure                                                                                                                                                                             |
| Kono et al (1986)        | Multiple Logistic Regression    | Relative Risk            | Age, smoking                                                                                                                                                                                                              |
| Maskarinec et al (1998)  | Proportional Hazards Regression | Relative Risk            | Ethnicity, age, years of education, body mass index, smoking status                                                                                                                                                       |
| Thun et al (1997)        | Proportional Hazards Regression | Relative Risk            | Education, body mass index, smoking, a crude index of fat consumption, use or nonuse of estrogen-replacement therapy in women                                                                                             |
| Yuan et al (1997)        | Proportional Hazards Regression | Relative Risk            | Age, level of education, cigarette smoking                                                                                                                                                                                |
